# Supplementary material for: Endoplasmic Reticulum stress-dependent expression of ERO1L promotes aerobic glycolysis in Pancreatic Cancer
Source: PubMed Central journal article supplement (PMC7381747; doi:10.7150/thno.45124), 2020-07-09
Supplement: thnov10p8400s1.pdf [file thnov10p8400s1.pdf]

## Supplementary information

**Table S1: Correlations between ERO1L expression and clinicopathologic parameters in PDAC patients**

| Clinicopathological parameter       | Total 205 | Expression of ERO1L |                 | P-value      |
|-------------------------------------|-----------|---------------------|-----------------|--------------|
|                                     |           | Low (n=102, %)      | High (n=103, %) |              |
| <b>Age (years)</b>                  |           |                     |                 |              |
| < 65                                | 97        | 51 (52.6)           | 46 (47.4)       | 0.486        |
| ≥ 65                                | 108       | 51 (47.2)           | 57 (52.8)       |              |
| <b>Gender</b>                       |           |                     |                 |              |
| Male                                | 117       | 63 (53.8)           | 54 (46.2)       | 0.205        |
| Female                              | 88        | 39 (44.3)           | 49 (55.7)       |              |
| <b>Tumor location</b>               |           |                     |                 |              |
| Head                                | 139       | 70 (50.4)           | 69 (49.6)       | 0.881        |
| Body/tail                           | 66        | 32 (48.5)           | 34 (51.5)       |              |
| <b>TNM (AJCC)</b>                   |           |                     |                 |              |
| Stage I                             | 38        | 24 (63.2)           | 14 (36.8)       | 0.316        |
| Stage II                            | 132       | 62 (47.0)           | 70 (53.0)       |              |
| Stage III                           | 21        | 9 (42.9)            | 12 (57.1)       |              |
| Stage IV                            | 14        | 7 (50.0)            | 7 (50.0)        |              |
| <b>Tumor size</b>                   |           |                     |                 |              |
| ≤ 3 cm                              | 69        | 45 (65.2)           | 24 (34.8)       | <b>0.002</b> |
| > 3 cm                              | 136       | 57 (41.9)           | 79 (58.1)       |              |
| <b>T classification</b>             |           |                     |                 |              |
| T1, 2                               | 42        | 26 (61.9)           | 16 (38.1)       | 0.086        |
| T3, 4                               | 163       | 76 (46.6)           | 87 (53.4)       |              |
| <b>Lymph node metastasis</b>        |           |                     |                 |              |
| Absent                              | 136       | 71 (52.2)           | 65 (47.8)       | 0.376        |
| Present                             | 69        | 31 (44.9)           | 38 (55.1)       |              |
| <b>Distant metastasis</b>           |           |                     |                 |              |
| Absent                              | 191       | 95 (59.7)           | 96 (50.3)       | 1.000        |
| Present                             | 14        | 7 (50.0)            | 7 (50.0)        |              |
| <b>Vascular invasion</b>            |           |                     |                 |              |
| Absent                              | 178       | 92 (51.7)           | 86 (48.3)       | 0.215        |
| Present                             | 27        | 10 (37.0)           | 17 (63.0)       |              |
| <b>Histological differentiation</b> |           |                     |                 |              |
| Well                                | 11        | 9 (81.8)            | 2 (18.2)        | <b>0.033</b> |
| Moderate/poor                       | 194       | 93 (47.9)           | 101 (52.1)      |              |

The bold number represents the *P*-values with significant differences. *P* value was calculated by  $\chi^2$  test or Fisher's exact test.

**Table S2: Univariate analysis of prognostic parameters for survival in PDAC patients**

| <b>Clinical parameters</b>                            | <b>HR</b> | <b>95% CI</b> | <b>P-value</b> |
|-------------------------------------------------------|-----------|---------------|----------------|
| Expression of ERO1L (high vs. low)                    | 1.606     | 1.142-2.260   | <b>0.004</b>   |
| Age ( $\geq$ 65 years vs. < 65 years)                 | 1.521     | 1.077-2.149   | <b>0.017</b>   |
| Gender (male vs. female)                              | 0.734     | 0.514-1.047   | 0.088          |
| Tumor location (head vs. body/tail)                   | 1.019     | 0.708-1.466   | 0.920          |
| TNM stage (III-IV vs. I-II)                           | 1.267     | 1.011-1.588   | <b>0.040</b>   |
| Tumor size (> 3 cm vs. $\leq$ 3 cm)                   | 2.141     | 1.182-3.879   | <b>0.012</b>   |
| T classification (T3, 4 vs. T1, 2)                    | 1.347     | 0.869-2.086   | 0.182          |
| Lymph node metastasis (present vs. absent)            | 1.487     | 1.049-2.109   | <b>0.026</b>   |
| Distant metastasis (present vs. absent)               | 1.945     | 1.041-3.634   | <b>0.037</b>   |
| Vascular invasion (present vs. absent)                | 1.579     | 0.969-2.572   | 0.067          |
| Histological differentiation (moderate/poor vs. well) | 2.475     | 1.011-6.058   | <b>0.047</b>   |

HR: Hazard ratio; CI: Confidence interval. The bold number represents the *P* value with significant differences.

**A**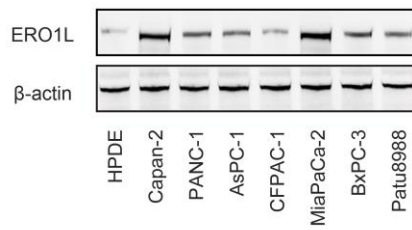**B**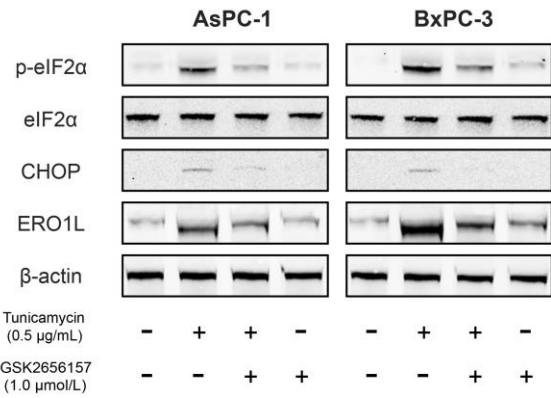

**Figure S1. UPR-dependent expression of ERO1L in PDAC cells.** (A) Western blotting analysis of ERO1L protein level in seven PDAC cell lines and the non-malignant HPDE cell line;  $\beta$ -actin was used as an internal control. (B) Western blotting analysis of the effect of PERK-EIF2 $\alpha$  inhibitor (GSK2656157) on ERO1L protein level in response to Tunicamycin-induced ER stress.

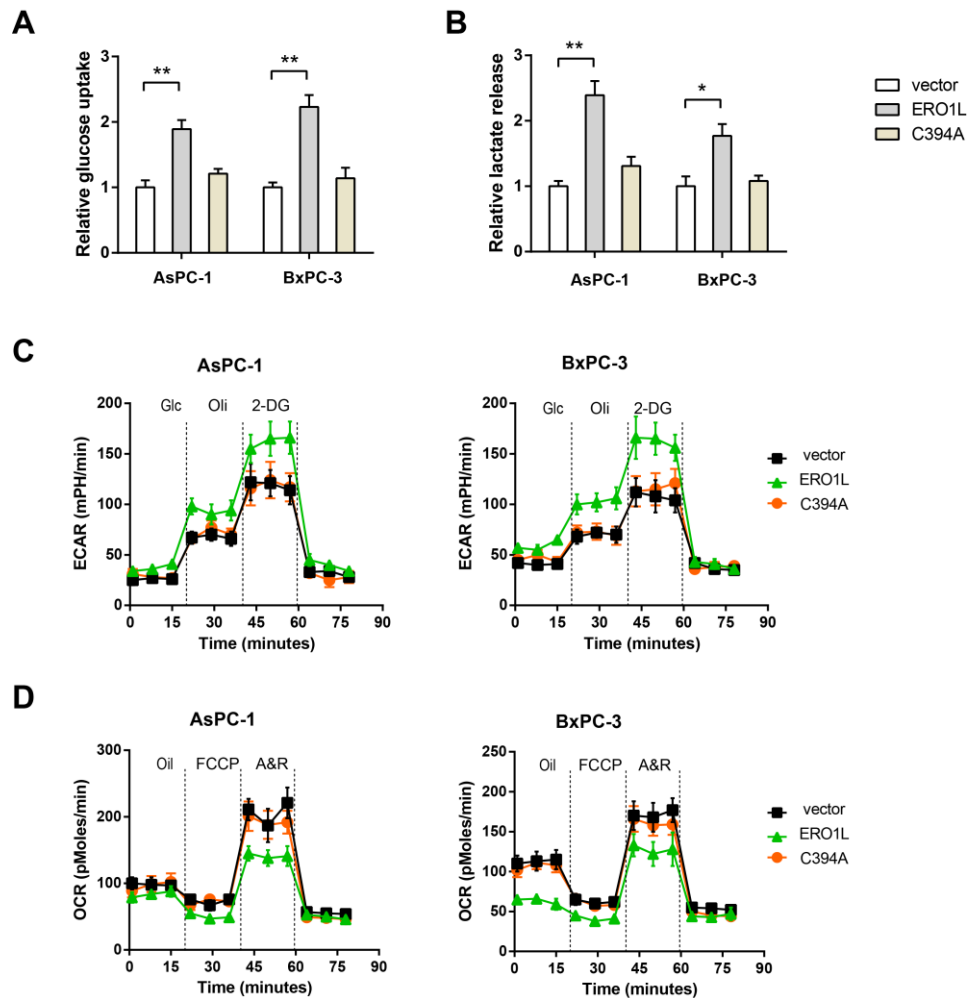

**Figure S2. Overexpression of ERO1L promotes the Warburg effect in pancreatic cancer cells.** (A) Measurement of glucose uptake in vector, ERO1L-overexpressing and ERO1L-C394A-overexpressing AsPC-1 and BxPC-3 cells (n = 3). (B) Measurement of lactate production in vector, ERO1L-overexpressing and ERO1L-C394A-overexpressing AsPC-1 and BxPC-3 cells (n = 3). (C-D) Detection of the extracellular acidification rate (ECAR, C) and oxygen consumption rate (OCR, D) in vector, ERO1L-overexpressing and ERO1L-C394A-overexpressing AsPC-1 and BxPC-3 cells (n = 3). \* $P < 0.05$  and \*\* $P < 0.01$ .

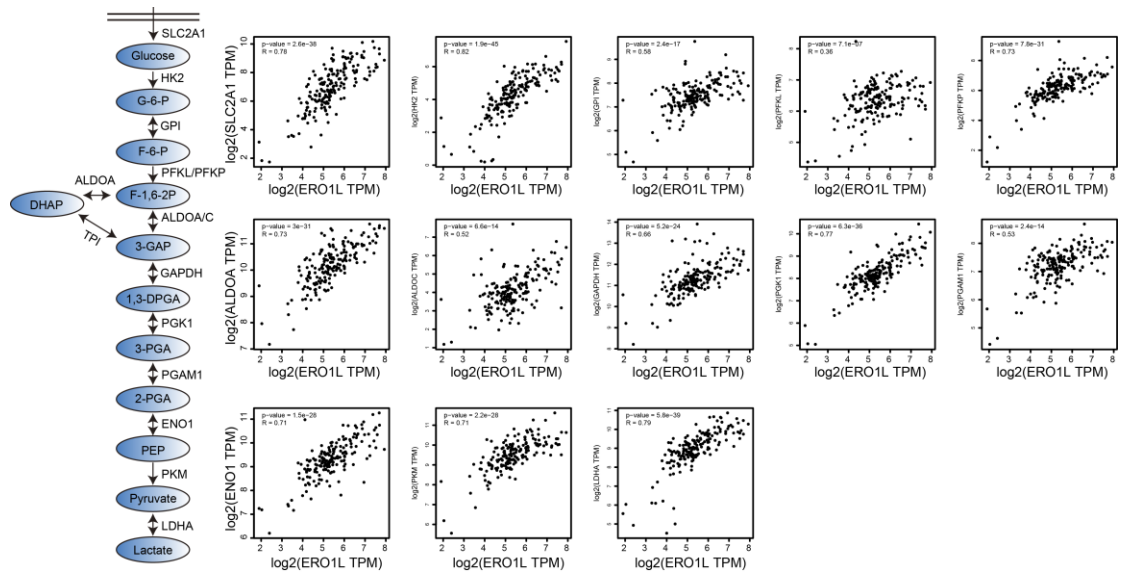

**Figure S3. Correlation analysis between ERO1L level and expression of glycolytic components (glucose transporter and glycolytic enzymes) in PDAC samples. Data were derived from TCGA cohort (n = 179).**

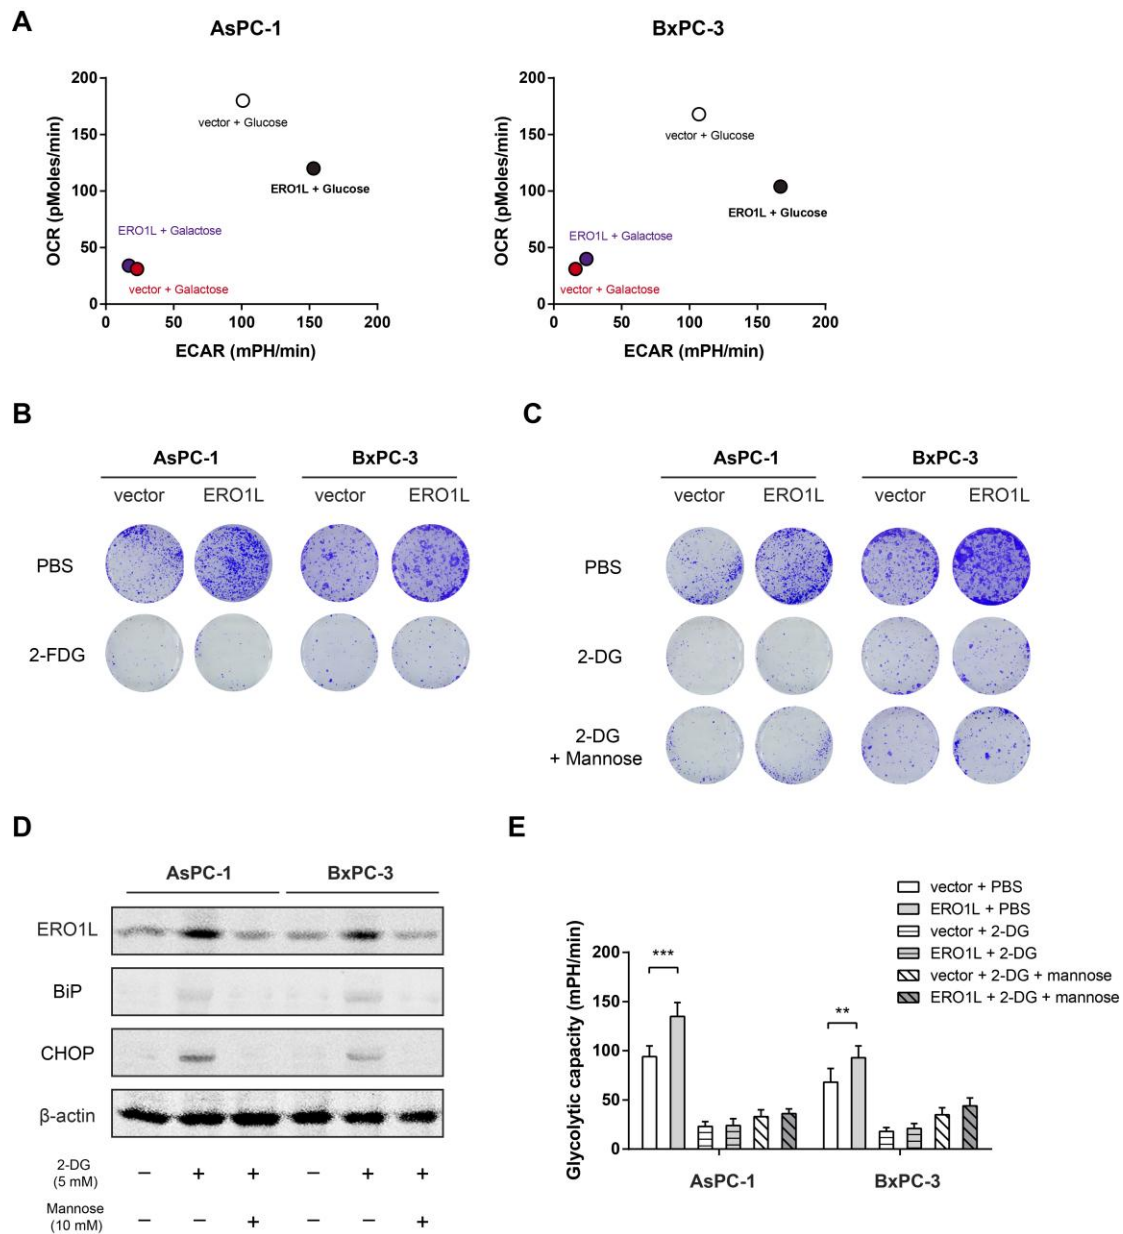

**Figure S4. Glycolysis-dependent growth-promoting effect of ERO1L in PDAC.** (A) Seahorse analysis of OXPHOS and glycolysis in the presence of galactose by measuring OCR and ECAR in AsPC-1 and BxPC-3 cells (n = 3). (B) Effect of 2-FDG on the plate colony formation ability of ov-vector and ov-ERO1L AsPC1 and BxPC3 cells (n = 3). (C) Effect of 2-DG on the plate colony formation ability of ov-vector and ov-ERO1L AsPC1 and BxPC3 cells in the presence or absence of 10 mM mannose (n = 3). (D) Effect of 2-DG (5 mM) on ER stress and ERO1L expression in the presence or absence of mannose (10 mM). (E) Seahorse analysis of the effect of 2-DG on the glycolytic capacity of AsPC1 and BxPC3 cells in the presence or absence of mannose (n = 9). \*\* $P < 0.01$  and \*\*\* $P < 0.001$ .

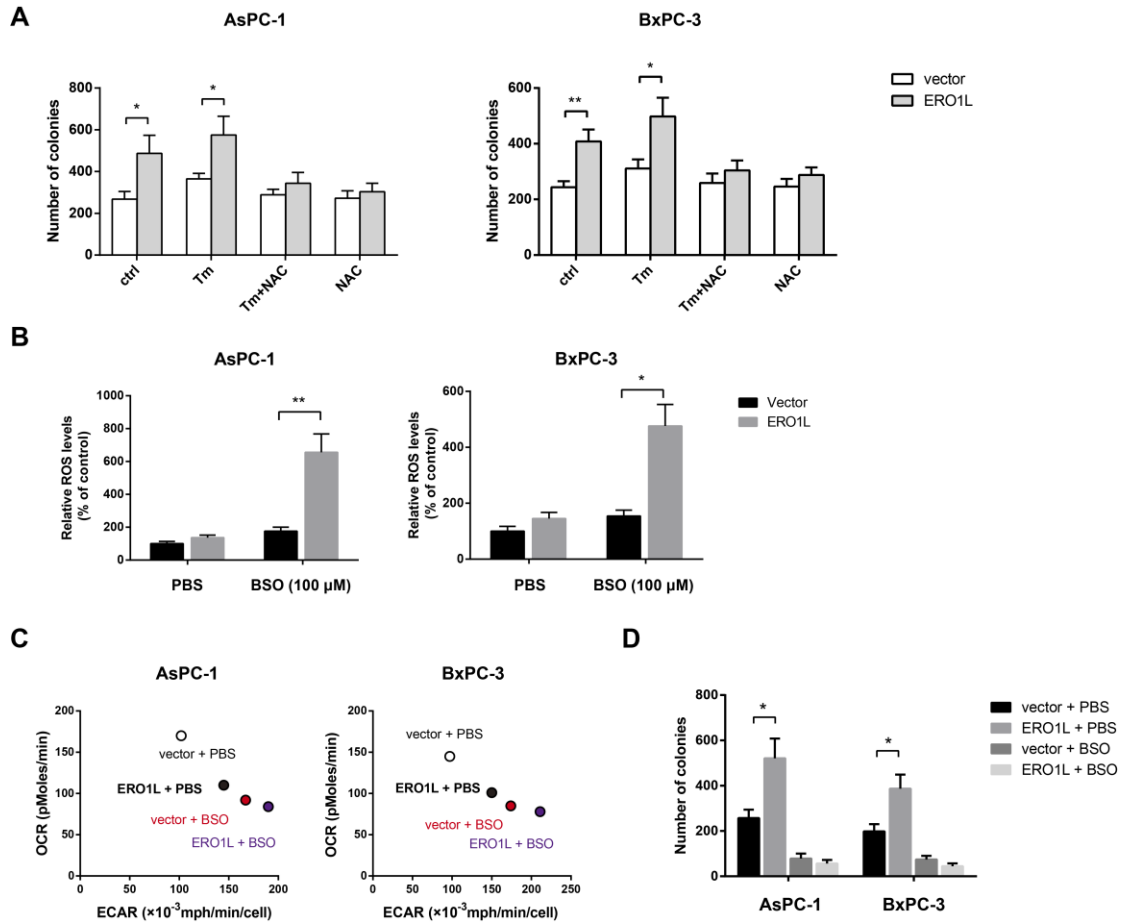

**Figure S5. ERO1L oxidoreductase activity is essential for its growth-promoting effect.**

(A) Neutralizing of ROS levels by N-acetyl cysteine (NAC, 0.2 mM) largely compromised the effect of ERO1L in facilitating tumor growth ( $n = 3$ ). (B) Effects of GSH inhibitor BSO (100  $\mu$ M) on ROS generation in ov-vector and ov-ERO1L AsPC-1 and BxPC-3 cells ( $n = 3$ ). (C) Seahorse analysis of OXPHOS and glycolysis in the presence of BSO treatment (100  $\mu$ M) by measuring OCR and ECAR in AsPC-1 and BxPC-3 cells ( $n = 3$ ). (D) Effect of BSO treatment (100  $\mu$ M) on the plate colony formation ability of ov-vector and ov-ERO1L AsPC-1 and BxPC-3 cells ( $n = 3$ ). \* $P < 0.05$  and \*\* $P < 0.01$ .
